# Supplementary material
Source: publisher figshare collection journal article supplement (https://tandf.figshare.com/ndownloader/files/16435358)
Supplement: Supplementary file 1 [file 16435358]

**Intercalation and exfoliation syntheses** **of** **high specific surface area graphene and FeC2O4/graphene composite for anode material of lithium ion battery**

Da Zhanga, Keyu Zhanga, Yaochun Yaoa, Feng Lianga,b ⃰, Tao Qua,b, Wenhui Maa, Bing Yanga, Yongnian Daia, Yong Leic.

*a[Faculty of Metallurgical and Energy Engineering](http://yn.kmust.edu.cn/indexen.asp), Kunming University of Science and Technology, Kunming 650093,* *China*

*bState Key Laboratory of Complex Nonferrous Metal Resources Clean Utilization, Kunming University of Science and Technology, Kunming 650093, China*

*cInstitute of Physics & IMN Macro Nanos (ZIK), Ilmenau University of Technology, Unterpörlitzer Strasse 38, Ilmenau 98693, Germany*


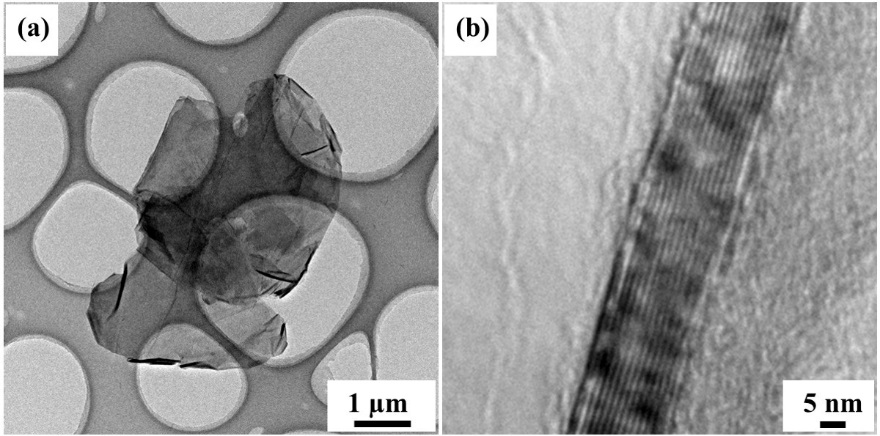


Fig. S1 (a) TEM, and (b) HRTEM of few-layers graphene obtained under the RCTK of 2:1 and water bath temperature of 15 ºC.


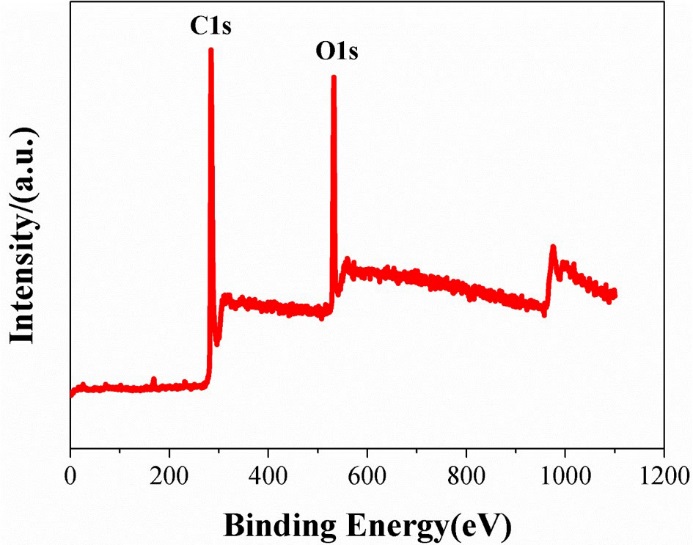


Fig. S2 XPS of graphite expansion composite obtained under the RCTK of 1:1with water bath temperature of 15 º**C**.
